# Supplementary material for: Performance and evaluation of remote sensing satellites for monitoring dust weather in East Asia
Source: Copernicus journal article supplement (doi:10.5194/egusphere-2025-992), 2025-03-21
Supplement: Supplementary file [file egusphere-2025-992-AC2-supplement.pdf]

---

1 **Response to Reviewer 1#**

2 1. Abstract: Full name of acronym (FY4A, MODIS, and POCD)

3 **Response: Thanks for your suggestion. We have now spelled out the full names of the**  
4 **acronyms (FY4A, MODIS, and POCD) in the abstract upon their first use (Line**  
5 **13, Line 14, Line 19).**

6 2. Lines 27-29: “When dust weather occurs, ... (Mahowald, 2011)”: More references  
7 should be added here.

8 **Response: We have expanded the discussion on dust weather impacts by adding key**  
9 **references (Mahowald, 2011; Kok et al., 2023; Zhuang et al., 2001) to better**  
10 **support this point in Line 29.**

11 3. Lines 45-47: “After the 1970s, with the rapid development of various earth  
12 observation...”: Instead of listing references, I suggest briefly introducing key  
13 previous studies closely related to this research and linking them individually to  
14 the references. This approach should be applied to many other sections of the  
15 manuscript as well.

16 **Response: Thanks. We have expanded the discussion of key studies in the specified**  
17 **section (Lines 45-47) by explicitly linking major advancements to their seminal**  
18 **references. This approach has been consistently applied throughout the**  
19 **manuscript to better contextualize our work within existing literature.**

20 4. Lines 53-77: This paragraph introduces the various sensors (distinguishing between  
21 GEO/LEO), algorithms, and the variables provided by each algorithm. I  
22 recommend to revise it to discuss their strengths and weaknesses and explain the  
23 rationale behind the selection of products in this study. For example, this study  
24 uses DT and DB products from three available MODIS aerosol products (DT,  
25 DB, and MAIAC). VIIRS continues MODIS observations, but the products are  
26 not used here. Although Korean Geostationary Satellites such as GEMS, GOCI,  
27 and AMI provide aerosol information, they are not used here. Additionally,  
28 references are needed for each aerosol product.

29 **Response: In lines 65-75, the referenced data has been supplemented with relevant**  
30 **citations. Additionally, we discussed the advantages and disadvantages of the**  
31 **product in both the data introduction and the results and discussion sections.**

32 5. Lines 86-87 “Its aerosol classification monitoring and vertical structure are  
33 currently the most comprehensive and accurate aerosol product” : On what basis

---

34 is this defined?

35 **Response: In Line 92-94, We have revised the statement to remove unsubstantiated**  
36 **absolute claims while maintaining emphasis on the product's utility, with**  
37 **supporting references added for verification.**

38 6. Line 94 “The strongest dust weather”: On what basis is this defined? There are  
39 many instances of dust being transported across the Pacific Ocean.

40 **Response: Following your comment, we have conducted a broader analysis of dust**  
41 **events and consequently removed the absolute descriptor "strongest" from the**  
42 **text.**

43 7. Lines 101-104 “However, the accuracy, stability, and reliability of these satellite  
44 remote sensing retrieval products are not clear for dust weather monitoring” :  
45 That is not true. Here is a quick example: <https://doi.org/10.1002/2015JD024103>

46 **Response: Lines 103-104, We have revised the expression to "Research assessing the**  
47 **accuracy, stability, and reliability of these satellite remote sensing retrieval**  
48 **products for dust storm monitoring has been scarce. "**

49 8. Line 116 “Spring (March-May) is the season when dust weather occurs frequently  
50 in East Asia”: Need reference.

51 **Response: Thanks. As suggested, we have added supporting references to this**  
52 **statement in Line 114.**

53 9. Lines 116-117 “the frequent activity of cold air in northern East Asia in spring  
54 provides a driving force for the formation of dust weather” : What does the ‘cold  
55 air activity’ refer to?

56 **Response: The cold air activity here refers to the Mongolian cyclone. We have made**  
57 **relevant modifications in the corresponding sections of the article and added**  
58 **references in Line 116.**

59 10. Figure 1: It is difficult to distinguish the dust scene from the background surface  
60 in this image. Why not provide a 'background RGB image' from a pristine day as  
61 a reference?

62 **Response: We have updated Figure 1 by adding a reference RGB image from a**  
63 **pristine dust-free day to enhance the contrast and visibility of dust features.**

64 11. 2.2.1 FY-4A: Could you summarize the definitions of the various dust indices in  
65 a formula or table to allow for a clearer comparison? Which wavelength is used

---

66 for deriving IDDI?

67 **Response:** The DST data documentation does not explicitly provide the formula, and  
68 some references only offer an introduction to the data. The formula for IDDI has  
69 been provided in Lines 165-168.

70 12. 2.2.2 MODIS: Please revise Modis into MODIS in the section.

71 **Response:** Thanks. We have corrected "Modis" to "MODIS" throughout Section 2.2.2  
72 to maintain consistent acronym formatting.

73 13. Line 177: remove 'the United State'

74 **Response:** We have removed "the United State" as suggested.

75 14. Line 181: remove 'for free'

76 **Response:** We have removed " for free " as suggested.

77 15. Line 183: MODIS provides multiple aerosol products (DT, DB, MAIAC...) and  
78 each algorithm provides Lv2 and Lv3 products.

79 **Response:** In Lines 183-185, we have revised this sentence "MODIS provides aerosol  
80 products with varying resolutions (1 km, 3 km, 10 km) for operational use,  
81 offering long-term and global coverage. One type includes daily atmospheric  
82 aerosol products with spatial resolutions of 10 km and 3 km, while another type  
83 features daily, 8-day, and monthly composite products with a spatial resolution of  
84  $1^\circ \times 1^\circ$ ."

85 16. Lines 187-188: "...while the DB algorithm was mainly designed to overcome the  
86 poor retrieve results of the DT algorithms in areas with high reflectance.": The  
87 DT algorithm is designed based on its theoretical background to target dark soil  
88 and vegetation surface. The Deep Blue algorithm was developed to overcome  
89 uncertainties in bright surfaces by utilizing observations from the deep blue  
90 channel. As a result, both the DT and DB algorithms perform complementary  
91 roles in global aerosol observations.

92 **Response:** In Lines 185-192, we have revised this sentence "These aerosol products  
93 are based on two famous aerosol retrieval algorithms, including the Dark Target  
94 (DT) algorithm on land/ocean and the Deep Blue (DB) algorithm on land (Hsu et  
95 al., 2013; Levy et al., 2013). Due to the significant impact of high-reflectivity  
96 areas such as deserts and snowfields on the atmospheric top layer reflectance in  
97 the red light and shortwave infrared bands, the linear relationship between the  
98 surface reflectance of red and blue light (0.65 and 0.47  $\mu\text{m}$  ) and the surface

---

99 reflectance in the shortwave infrared band (2.11  $\mu\text{m}$ ) does not hold. This makes it  
100 difficult to distinguish the contributions from aerosols and the ground (Hsu et al.,  
101 2013). In contrast, the DB algorithm shows better retrieval results in these areas,  
102 as its initial development aimed to overcome the uncertainties in retrieval results  
103 in high-reflectance environments.”

104 17. Line 194: Collection 6.1 is the latest version, though it was not released recently.  
105 A new DT GEO-LEO combined products is available here:  
106 [ladsweb.modaps.eosdis.nasa.gov/missions-and-measurements/applications/geoleo/](https://ladsweb.modaps.eosdis.nasa.gov/missions-and-measurements/applications/geoleo/)  
107 o/

108 Response: Thank you for your reminder. We have revised the description of  
109 Collection 6.1 in Line 195.

110 18. Lines 207-209 “It can effectively observe trace gas components in the atmosphere  
111 around the world...”: TROPOMI/S5P instrument provides hyperspectral  
112 measurements in UV visible, NIR and SWIR, which are also advantageous for  
113 retrieving aerosol absorptivity (like SSA) and aerosol layer height.

114 Response: In Lines 199-202, we have revised this sentence “As the world's  
115 highest-resolution and most advanced imaging spectrometer for atmospheric  
116 environmental monitoring, TROPOMI provides hyperspectral measurements  
117 across ultraviolet (UV), visible (VIS), near-infrared (NIR), and shortwave  
118 infrared (SWIR) bands (Veefkind et al, 2012).”

119 19. Line 221: aerosol optical thickness aerosol optical depth

120 Response: We modified this word in Line 213.

121 20. Line 249-251: The sentence here is unclear. What does “the value at 470 nm is  
122 higher than the value at 640 nm” means? “...using the spectral dependence of  
123 surface reflectance...”: Does it mean the surface reflectance relationship  
124 suggested in Kaufman et al. (1997)?

125 Response: Based on your feedback, we have reorganized this sentence in Lines  
126 239-243 as follows: Then, the pixels with the second lowest reflectance at  
127 470nm within a month are synthesized. Pixels exhibiting values at 470 nm that  
128 are higher than those at 640 nm are suspected of being influenced by residual  
129 aerosol contamination. To address this, these pixels will be replaced with  
130 reflectance values calculated based on the vegetation index, utilizing the spectral  
131 dependence of surface reflectance (Kaufman et al., 1997). These results will be  
132 considered as the true surface reflectance.

133 21. 2.3 Method: I would recommend summarizing the criteria for strategy for

---

134 detecting dust pixels in a table or diagram.

135 **Response: Based on your suggestions, we have added Table 1 in Section 2.3 to**  
136 **summarize the criteria for detecting dust pixels.**

137 22. Line 261 "...its size": 'magnitude' might be better than 'size'.

138 **Response: We have modified this.**

139 23. Line 281 "ground environmental monitoring stations": Authors need to provide  
140 the characteristics of the PM10 observation (ex. Retrieval frequency, accuracy,  
141 sensor calibration...)

142 **Response: The observational characteristics of PM10 have been introduced in Section**  
143 **2.1.**

144 24. Line 307 "Figure 3": Maybe Figure 2?

145 **Response: Thank you for your reminder. We have carefully checked the details in the**  
146 **text.**

147 25. Figure 2: Please indicate the region mentioned in the text on the figure. This will  
148 make it easier to follow the discussion.

149 **Response: The mentioned parts have been labeled in Figure 1. For the areas that could**  
150 **not be marked in Figure 1, we have also included the latitude and longitude**  
151 **range at the first mention.**

152 26. Figure 2 and Figure 3: I recommend aligning the projection areas to facilitate  
153 comparison between the dust index and PM<sub>10</sub> concentration. Why not consider  
154 combining Figure 2 and Figure 3?

155 **Response: Following your recommendation, we have merged this and processed**  
156 **similar Figures within the text.**

157 27. Figure 4: It is recommended that each figure be accompanied by a title. It is  
158 questionable whether analyzing trends in this figure is appropriate, given that  
159 POCD and POFD are unlikely to vary continuously across space and time.

160 **Response: First, we changed the chart from a line graph to a bar chart, and secondly,**  
161 **we will no longer analyze the trends.**

162 28. Lines 355-358 "In order to better prove the application ... the atmospheric dust  
163 detection capabilities of the FY-4A DSD product.": This appears to be an

---

164 unnecessary statement. Removing it will improve conciseness and flow without  
165 losing important content.

166 **Response: Okay, this sentence in the text has been deleted.**

167 29. Lines 370-371 “misjudgment and omission of atmospheric dust detection by  
168 satellite remote sensing are inevitable”: The current phrasing incorrectly  
169 generalizes limitations to all satellite remote sensing. This should be narrowed to  
170 specifically address the FY-4A dust products being discussed.

171 **Response: Okay, we have added the qualifier 'of FY-4A/B' at the end.**

172 30. Line 409 “Generally speaking, when large-scale dust weather occurs, the main  
173 pollutant in the atmosphere is dust.” I guess it depends on season, time, and  
174 location.

175 **Response: Thank you for your reminder. We have modified this sentence in Lines  
176 409-410 as follows: For East Asia, especially in northern China, when  
177 large-scale sandstorms occur in the spring, the main pollutant in the atmosphere  
178 within the affected area is dust (Filonchyk, 2022; Song et al., 2022)**

179 31. Line 420 “Therefore, compared with the DB algorithm, the DT algorithm is not  
180 suitable for AOD retrieval in areas with high surface reflectance.”: The current  
181 statement presents an overly simplistic and potentially misleading view of the  
182 algorithms' capabilities. While the DB algorithm performs better in areas with  
183 bright surface, the DT algorithm provides accurate aerosol products over dark  
184 soil, vegetation and ocean surfaces. Each algorithm has its own strengths and  
185 limitations, with DT being more limited when performing retrievals over brighter  
186 surfaces.

187 **Response: The discussion of the DT and DB algorithms has been removed from the  
188 results section of the article, so this paragraph has been deleted**

189 32. Figure 6: Author need to clarify collocation criteria for the satellite aerosol  
190 products and ground-based PM10 observation.

191 **Response: The collocation criteria are discussed in the last paragraph of Section 2.3.**

192 33. Line 494 “Therefore, the AAI calculation method is not a classic aerosol retrieval  
193 method.”: What is the classic aerosol retrieval? The field of aerosol remote  
194 sensing employs numerous diverse approaches and algorithms for retrieving  
195 aerosol information, each with specific applications, advantages, and limitations.

196 **Response: Yes, I have deleted this inaccurate expression.**

---

197 34. Lines 519-520 “However, due to the limitation of the satellite observation range,  
198 Himawari-8 cannot effectively monitor dust activities in central and western  
199 Xinjiang, China.”: It would like to recommend revising it to “Due to the limited  
200 field of view from geostationary orbit, Himawari-8 has reduced observational  
201 capability in central and western Xinjiang, China.”

202 **Response: Thank you for your suggestion. We have revised this sentence in Lines**  
203 **536-538.**

204 35. Lines 562-563 “However, the performance of the Himawari-8 AOD product was  
205 worse than that of several other products.”: It is hard to tell from the results  
206 shown here.

207 **Response: In the latest version of the manuscript, this conclusion is no longer drawn.**

208 36. Reference: Suggest reviewing the manuscript to ensure that the references are  
209 appropriately used.

210 **Response: Regarding the references, we have made careful modifications and**  
211 **verifications**
